# Supplementary material for: A QM/MM study on through space charge transfer-based thermally activated delayed fluorescence molecules in the solid state
Source: Royal Society of Chemistry journal article supplement (doi:10.1039/d1tc05159h), 2021-12-03
Supplement: d1tc05159h1.pdf [file d1tc05159h1.pdf]

***Supplementary Information for***

**A QM/MM Study on Through Space Charge Transfer based  
Thermally Activated Delayed Fluorescence Molecule in Solid  
State**

Haipei Zou<sup>1</sup>, Yuying Ma<sup>1</sup>, Huanling Liu<sup>1</sup>, Qingfang Mu<sup>1</sup>, Kai Zhang<sup>1</sup>, Yuzhi Song<sup>1</sup>,  
Lili Lin<sup>1</sup>, Chuan-Kui Wang<sup>1\*</sup>, Jianzhong Fan<sup>1,2\*</sup>

1. Shandong Province Key Laboratory of Medical Physics and Image Processing Technology, Institute of Materials and Clean Energy, School of Physics and Electronics, Shandong Normal University, Jinan 250014, China.
2. Guangdong Provincial Key Laboratory of Luminescence from Molecular Aggregates (South China University of Technology), Guangzhou 510640, China.

**Corresponding Author**

\*Author to whom correspondence should be addressed.

E-mail: [fanjianzhongvip@163.com](mailto:fanjianzhongvip@163.com) and [ckwang@sdu.edu.cn](mailto:ckwang@sdu.edu.cn)

### ***Computational details for TBCT and TSCT ratios.***

Firstly, the non-relaxation part of charge transfer (CT) can be obtained by analyzing the hole-electron distribution when molecule is excited. CT ratio with this concept can be analyzed by IFCT method, based on the following equation:

$$Q_{R,S} = \Theta_{R,hole} \Theta_{S,ele}$$

Here,  $Q_{R,S}$  represents the charge transfer quantity from part R to part S,  $\Theta_{R,hole}$  means the excited electron amount occupied by R part,  $\Theta_{S,ele}$  is the arrived electron amount occupied by S part. Then pure amount of electron transfer can be calculated by following formula:

$$p_{S \rightarrow R} = Q_{S,R} - Q_{R,S}$$

$$\Delta p_R = \sum_{s \neq R} Q_{S,R} - Q_{R,S}$$

Where,  $p_{S \rightarrow R}$  represents the pure amount of electron transfer of two parts,  $\Delta p_R$  is the charge variation of one part. Based on these functions, the charge transfer ratio can be calculated quantitatively. Among these, the direct CT ratio between D-A can be regarded as through-space CT, the CT ratios of D- $\pi$  and  $\pi$ -A are regard as through-bond CT.

However, if there is no spatial overlap between holes and electrons in one molecule, the transition is forbidden although with large charge transfer. In other words, this part of charge transfer does not contribute to the absorption or emission. So, what we concerned about is that the CT transition which can contribute to emission and absorption. To solve this issue, we analyze the transition density by the following function:

$$\rho_{TB} = \rho_{tot} - \rho_{TS}$$

Here,  $\rho_{tot}$  means the transition density integral of the whole molecule, and  $\rho_{TS}$  represents the transition density integral of the molecule with deleted  $\pi$  bridge,  $\rho_{TB}$  is then obtained.

Secondly, following the abovementioned method, we should define the donor part,

acceptor part and bridge part. Take the studied molecule as example (as shown in Figure S1), the atom number of the donor, acceptor and bridge should be determined initially. Atom numbers of 3,5-48 are classified as donor, 1-2,4,59-67 as acceptor and 49-58 as bridge. Then, we implement the program script provided by Cheng Zhong carried out by Multiwfn in Linux system. After that, we can get the TSCT and TBCT ratios and corresponding results are shown in Figure S2.

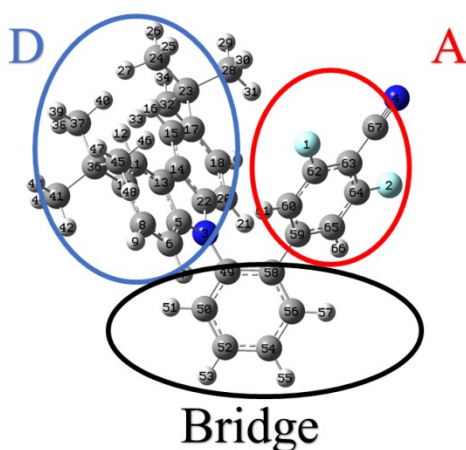

Figure S1. Atom numbers of the donor part, acceptor part and bridge part for studied molecule S-CNDF-S-*t*Cz.

```

TS/TB using transition density:
Through Space CT: 0.17488    64.52%
Through Bond   CT: 0.09615    35.47%
Tot transit dens: 0.27103

TS/TB using transition density:
Through Space CT: 0.18113    65.67%
Through Bond   CT: 0.09466    34.32%
Tot transit dens: 0.27579

```

Figure S2. Calculation results for molecule in chloroform and in solid phase of  $S_1$  state performed by Multiwfn.

Table S1. Calculated emission wavelengths with different basis set for molecule in chloroform and solid phase, respectively.

|            | Emission Wavelength(nm) |         |          |          |           |         | Exp |
|------------|-------------------------|---------|----------|----------|-----------|---------|-----|
|            | 6-31G*                  | 6-31+G* | 6-31++G* | 6-31+G** | 6-31++G** | 6-311G* |     |
| Chloroform | 492.13                  | 506.86  | 506.86   | 491.87   | 507.01    | 498.35  | 476 |
| Solid      | 482.25                  | 493.91  | 493.89   | 482.41   | 494.09    | 488.29  | 445 |

Table S2. Calculated absorption wavelengths and oscillator strength for selected states by PBE0 and PBE0-GD3BJ are listed, respectively.

|                            | Excited states | S <sub>1</sub> | S <sub>2</sub> | S <sub>3</sub> | S <sub>4</sub> | Exp  |
|----------------------------|----------------|----------------|----------------|----------------|----------------|------|
| Absorption wavelength (nm) | PBE0-GD3BJ     | 398.80         | 351.35         | 301.73         | 290.43         | 340  |
|                            | PBE0           | 397.16         | 353.79         | 301.54         | 287.04         |      |
| Oscillator strength        | PBE0-GD3BJ     | 0.016          | 0.004          | 0.068          | 0.054          | ---- |
|                            | PBE0           | 0.010          | 0.005          | 0.071          | 0.050          |      |

Table S3. Emission wavelength, energy gaps and oscillator strength are calculated by PBE0 and PBE0-GD3BJ, respectively.

|                           | PBE0  | PBE0-GD3BJ | Experiment |
|---------------------------|-------|------------|------------|
| Emission wavelength (nm)  | 492   | 497        | 476        |
| $\Delta E_{S_1-T_1}$ (eV) | 0.29  | 0.27       | ----       |
| $\Delta E_{S_1-S_0}$ (eV) | 2.81  | 2.81       | ----       |
| $\Delta E_{T_1-S_0}$ (eV) | 2.52  | 2.54       | ----       |
| Oscillator strength       | 0.017 | 0.012      | ----       |
